# Supplementary material for: Differential expression of some termite neuropeptides and insulin/IGF-related hormones and their plausible functions in growth, reproduction and caste determination
Source: PubMed Central journal article supplement (PMC10148640; doi:10.7717/peerj.15259), 2023-04-26
Supplement: peerj-11-15259-s001.pdf [file peerj-11-15259-s001.pdf]

## Supplementary Data

# Differential expression of some termite neuropeptides and insulin/IGF-related hormones and their plausible functions in growth, reproduction and caste determination

**Jan A. Veenstra**

## Table of contents

|                         |         |
|-------------------------|---------|
| SRA's used              | page 2  |
| SRA's used for figure 5 | page 4  |
| Figure S1               | page 5  |
| Figure S2               | page 6  |
| Figure S3               | page 7  |
| Figure S4               | page 8  |
| Figure S5               | page 9  |
| Figure S6               | page 10 |
| Figure S7               | page 11 |
| Figure S8               | page 12 |
| Figure S9               | page 13 |
| Figure S10              | page 14 |
| Figure S11              | page 15 |
| Figure S12              | page 16 |
| Figure S13              | page 17 |
| Figure S14              | page 18 |

## SRA's used:

*Coptotermes formosanus* : SRR2155575, SRR2155576, SRR2155577, SRR2155578, SRR10273592, SRR10273593, SRR10273594, SRR10273595, SRR10273596 and SRR10273597.

*Cryptocercus meridianus* : SRR12393556, SRR12393557, SRR12393558, SRR12393559 and SRR12393572.

*Cryptocercus punctulatus* : DRR058700, DRR058701, DRR058702 and DRR058703.

*Cryptocercus wrighti* : SRR921587.

*Cryptotermes secundus* : ERR2615943, ERR2615944, ERR2615945, ERR2615946, ERR2615947, ERR2615948, ERR2615949, ERR2615952, ERR2615950, ERR2615951, ERR2615953, ERR2615954, SRR5457739, SRR5457740, SRR5457741, SRR5457742, SRR5457743, SRR5457744, SRR5457745, SRR5457746, SRR5457747, SRR5457748, SRR5457749, SRR12381713, SRR12381714, SRR12381715, SRR12381716, SRR12381717, SRR12381718, SRR12381719, SRR12381720, SRR12381721, SRR12381722, SRR12381723, SRR12381724, SRR12381725, SRR12381726, SRR12381727, SRR12381728, SRR12381729, SRR12381730, SRR12381731, SRR12381732, SRR12381733, SRR12381734, SRR12381735, SRR12381736, SRR12381737, SRR12381738, SRR12381739, SRR12381740, SRR12381741, SRR12381742, SRR12381743, SRR12381744, SRR12381745, SRR12381746, SRR12381747, SRR12381748, SRR12381749, SRR12381750, SRR12381751, SRR12381752, SRR12381753, SRR12381754, SRR12381755, SRR12381756, SRR13221217, SRR13221218, SRR13221219, SRR13221220, SRR13221221, SRR13221222, SRR13221223, SRR13221224, SRR13221225, SRR13221226, SRR13221227, SRR13221228, SRR13221229, SRR13221230, SRR13255030, SRR13255031, SRR13255032, SRR13255033, SRR13255034, SRR13255035, SRR13255036, SRR13255037, SRR13255038, SRR13255039, SRR13255040, SRR13255041, SRR13255042, SRR13255043, SRR13255044, SRR13255045, SRR13255046, SRR13255047, SRR13255048, SRR13255049, SRR13255050, SRR13255051, SRR13255052, SRR13255053, SRR13255054, SRR13426400, SRR13426401, SRR13426402, SRR13426403, SRR13426404, SRR13426405, SRR13426406, SRR13426407, SRR13426408, SRR13426409, SRR13426410, SRR13426411, SRR15145186, SRR15145187, SRR15145188, SRR15145189, SRR15145190, SRR15145191, SRR15145192, SRR15145193, SRR15145194, SRR15145195, SRR15145196, SRR15145197, SRR15145198, SRR15145199, SRR15145200, SRR15145201, SRR15145202, SRR15145203, SRR15145204, SRR15145205, SRR15145206, SRR15145207, SRR15145208, SRR15145209, SRR15145210, SRR15145211, SRR15145212, SRR15145213, SRR15145214, SRR15145215, SRR15145216 and SRR15145217.

*Cryptotermes domesticus* : SRR2039534.

*Globitermes sulphureus* : SRR7170939, SRR9968581 and SRR12393576.

*Hodotermopsis sjostedti* : DRR084180, DRR084181, DRR084182, DRR084183, DRR084184, DRR084185 and DRR084186.

*Labritermes buttelreepeni* : SRR9968587.

*Macrotermes barneyi* : SRR3178362, SRR3182796, SRR3182798, SRR3182799, SRR3182800, SRR3182801, SRR3182802, SRR3182803, SRR3182804, SRR3182805, SRR3182806, SRR3182808, SRR3182809, SRR3182810 and SRR3182811.

*Macrotermes bellicosus* : ERR2532157, ERR2532158, ERR2532159, ERR2532160, ERR2532161, ERR2532162, ERR2532163, ERR2532164, ERR2532165, ERR2532166, ERR2532167, ERR2532168, ERR2532169, ERR2532170, ERR2532171, ERR2532172, ERR2532173, ERR2532174, ERR2532175, ERR2532176, ERR2532177, ERR2532178, ERR2532179, ERR2532180, ERR2532181, ERR2532182, ERR2532183, ERR2532184, ERR2532185, ERR2532186, ERR2532187, ERR2532188, ERR2532189, ERR2532190, ERR2532191, ERR2532192, SRR14432658, SRR14432659, SRR14432660,

SRR14432661, SRR14432662, SRR14432663, SRR14432664, SRR14432665, SRR14432666, SRR14432667, SRR14432668, SRR14432669, SRR14432670 and SRR14432671.

*Macrotermes natalensis* : SRR789255, SRR789327, SRR789336, SRR789341, SRR789345, SRR789352, SRR789356, SRR789363, SRR789369, SRR789377, SRR5457275, SRR5457276, SRR5457277, SRR5457278, SRR5457279, SRR5457280, SRR5457281, SRR5457282, SRR5457283, SRR5507526, SRR5507527, SRR13396076, SRR13396077, SRR13396078, SRR13396079, SRR13396080, SRR13396081, SRR13396082, SRR13396083, SRR13396084, SRR13396085, SRR13396086, SRR13396087, SRR13396088, SRR13396089, SRR13396090, SRR13396091, SRR13396092, SRR13396093, SRR13396094, SRR13396095, SRR13396096, SRR13396097, SRR13396098, SRR13396099 and SRR13396100.

*Mastotermes darwiniensis* : SRR921616, SRR6869961, SRR8924830, SRR8924831 and SRR12393550.

*Nasutitermes takasagoensis* : DRR162556, DRR162557, DRR162558, DRR162559, DRR162560 and DRR162561.

*Neotermes castaneus* : SRR12393532, SRR12393533, SRR12393534, SRR12393535, SRR12393536, SRR12393537, SRR12393538, SRR12393539, SRR12393540, SRR12393541, SRR12393542, SRR12393543, SRR12393544, SRR12393545, SRR12393546, SRR12393547, SRR12393548, SRR12393549, SRR12393551, SRR12393560, SRR12393562, SRR12393563, SRR12393564, SRR12393565, SRR12393566, SRR12393567, SRR12393568, SRR12393569, SRR12393570, SRR12393571 and SRR12393573.

*Prorhinotermes opinatus* : SRR12393582.

*Prorhinotermes simplex* : SRR921637, SRR13236743, SRR13236744, SRR13236745, SRR13236746, SRR13236747, SRR13236748 and SRR13236749.

*Reticulitermes aculabialis* : SRR9140410, SRR9140411, SRR9140412, SRR9140413, SRR9140414, SRR9140415, SRR9140416, SRR9140417 and, SRR9140418.

*Retitculitermes chinensis* : SRR10604052, SRR10604053, SRR10604054, SRR10604055, SRR10604056, SRR10604057, SRR10604058, SRR10604059, SRR10604060, SRR10604061, SRR10604062, SRR10604063, SRR18067184, SRR18067185, SRR18067186, SRR18067187, SRR18067188 and SRR18067189.

*Retitculitermes flavipes* : SRR5341585, SRR5341586, SRR5341587, SRR5341588, SRR5341589, SRR5341590, SRR5341591, SRR5341592 and SRR5341593.

*Retitculitermes labralis* : SRR5801942, SRR5808263, SRR8707277, SRR8707278, SRR8707279, SRR9301201, SRR9301202, SRR9301203, SRR9301204, SRR9301205, SRR9301206, SRR9301207, SRR9301208 and SRR9301209.

*Retitculitermes speratus* : DRR030795, DRR030796, DRR030797, DRR030798, DRR030799, DRR030800, DRR030801, DRR030802, DRR030803, DRR030804, DRR030805, DRR030806, DRR030807, DRR030808, DRR030809, DRR030810, DRR030811, DRR030812, DRR030813, DRR030814, DRR030815, DRR030816, DRR030817, DRR030818, DRR030819, DRR030820, DRR030821, DRR030822, DRR030823, DRR030824, DRR030825, DRR030826, DRR030827, DRR030828, DRR030829, DRR030830, DRR030831, DRR030832, DRR030833, DRR030834, DRR030835, DRR030836, DRR030837, DRR030838, DRR030839, DRR030840, DRR030841, DRR030842, DRR030843, DRR030844, DRR030845, DRR030846, DRR030847, DRR030848, DRR030849, DRR030850, DRR030851, DRR030852, DRR030853, DRR030854, DRR090831, DRR090838, DRR090840, DRR090841, DRR090842, DRR090843, DRR090844, DRR090846, DRR090847, DRR090848, DRR090852, DRR090853, DRR090854, DRR090855, DRR090856, DRR090857, DRR090858, DRR090859, DRR090860, DRR090861, DRR090862, DRR090863, DRR090864, DRR090865, DRR252502, DRR252503, DRR252504, DRR252505, DRR266547,

DRR266548, DRR266549, DRR266550, DRR266551, DRR266552, DRR266553, DRR266554, DRR266555, DRR266556, DRR266557, DRR266558, DRR266559, DRR266560, DRR266561, DRR266562, DRR332717, DRR332718, DRR332719, DRR332720, DRR332721, DRR332722, DRR332723, DRR332724, DRR332725, DRR332726, DRR332727, DRR332728, DRR332729, DRR332730, DRR332731, DRR332732, DRR332733, DRR332734, DRR332735, DRR332736, DRR332737, DRR332738, DRR332739, DRR332740, DRR332741, DRR332742, DRR332743, DRR332744, DRR332745, DRR332746, DRR332747, DRR332748, DRR332749, DRR332750, DRR332751, DRR332752, DRR332753, DRR332754, DRR332755, DRR332756, DRR332757, DRR332758, DRR332759, DRR332760, DRR332761, DRR332762, DRR332763, DRR332764, DRR332765, DRR332766, DRR332767, DRR332768, DRR332769, DRR332770, DRR332771, DRR332772, DRR332773, DRR332774, DRR332775, DRR332776, DRR332777, DRR332778, DRR332779, DRR332780, DRR332781, DRR332782, DRR332783, DRR332784, DRR332785, DRR332786, DRR332787, DRR332788, DRR357004, DRR357005, DRR357006, DRR357007, DRR357008, DRR357009, DRR357010, DRR357011, DRR357012, DRR357013, DRR357014, DRR357015, DRR357016, DRR357017, DRR357018 and DRR357019.

*Zootermopsis nevadensis* : DRR110536, DRR110537, DRR110538, DRR110539, DRR110540, DRR110541, DRR110542, DRR110543, DRR110544, DRR110545, DRR110546, DRR110547, DRR110548, DRR110549, DRR110550, DRR139981, DRR139982, DRR139983, DRR139984, DRR139985, DRR139986, DRR139987, DRR139988, DRR151559, DRR151560, DRR151561, DRR151562, DRR151563, DRR151564, DRR151565, DRR151566, DRR151567, DRR151568, DRR151569, DRR151570, SRR863596, SRR863597, SRR863598, SRR863599, SRR863601, SRR863602, SRR863603, SRR863604, SRR863605, SRR863606, SRR863612, SRR863613, SRR1167035, SRR1167037, SRR1167039, SRR1167040, SRR1167041, SRR1167042, SRR1167043, SRR1167044, SRR1167178, SRR1167247, SRR1167255, SRR1167256, SRR3139733, SRR3139734, SRR3139735, SRR3139736, SRR3139737, SRR3139738, SRR3139739, SRR3139740, SRR3139741, SRR3139742 and SRR3139743.

**SRA**s used for figure 5:

ERR2615943, ERR2615944, ERR2615945, ERR2615946, SRR5457742, SRR5457743, SRR5457744, SRR5457745, SRR12381714, SRR12381716, SRR12381718, SRR12381721, SRR12381723, SRR12381725, SRR12381727, SRR12381728, SRR12381730, SRR12381732, SRR12381734, SRR12381736, SRR12381738, SRR12381740, SRR12381743, SRR12381744, SRR12381745, SRR12381746, SRR12381747, SRR12381748, SRR12381755 and SRR12381756.

```

Blattella      MKNFQAQVIV-ITAAILLHQCAGRPEYEDCNRKIRROILES CSSEK GKRS AEYDTPSLPM
Periplaneta   MKPHFALVIVVVV-STLFOAGIKGEKYENC SKKLRQLILDS CNEPKNKRSAVFERHGFNM
Cryptocercus  MKSILILVIVAT-SSLLHESFGSSDYKY CSKKMRQLILDS CSEP KGRSA I LADYNLNK
Zootermopsis  MKSFMALVIAVVTSAVVLQEGVRS SDYENC SKKMRQLILDS CAEPKGRNAFLADFNWNI
Hodotermopsis MKILVALVIVVTSAFVLOEGVGISDYENC SKKMRQLILDS CAEPKGRNAFLADYNWNV
Cryptotermes  MKELLVLIIVVMTSAHLLQESVANSHYENC SKKMRQLILDS CAEPKDKRNA I LAENKDLF
Macrotermes   -----SILLPERVANS DYENC SKKLRQLVHNS CAESLDKRRAILVQD---I
1.....10.....20.....30.....40.....50.....

Blattella      HD----EELONAPS-SALLGRILGVPSQWTADDVAVNNANRQVKRSPETIROLMIDCCL
Periplaneta   HSPHLPQDRSQOVTSS-VLLGKILGVPSQWTEEELSSHQINKQFRRNQSVRNLIIECCV
Cryptocercus  FYPHSVHIEVRHIASP-AMLGKILGVPSHWTEDLVSLDDSSQYKRTLPEENDLIVMCCA
Zootermopsis  HP---PRKAAQHTVSP-ALLGKVLGVPEHWMEGVVS LDDSKQPQRNLQAVHNLIVECCV
Hodotermopsis PP---PHTPARHTASP-ALLGKLLGVPEHWT EGLVSLDDSQ-QORRNLQAVHNLIVECCV
Cryptotermes  -T---RHRPAQQSASPSLLAGKVLGVPSCWTEDLAIFDDSNIOHRRNLPAVHNLIVECCV
Macrotermes   FYTDAPNKPAPRQTPSP--SAGKILCVPSHWTDLLASFD DTKNQHRRKLP EVON*IVECCV
61.....70.....80.....90.....100.....110.....

Blattella      ANCSPDRFLGMC*-----
Periplaneta   DGCTPNQIMGLCD*-----
Cryptocercus  NGCDPSKIVGLCN*-----
Zootermopsis  DGCTPYQIVGLCN*-----
Hodotermopsis DGCTPNQIVGLCN*-----
Cryptotermes  DGCTPSQILGLCN*-----
Macrotermes   DGCSPROVLGLCNRTHRFSFKA*
121.....130.....140.

```

**Figure S1.** Sequence comparison of predicted gonadulin sequences from three cockroach species, *Blattella germanica*, *Periplaneta americana* and *Cryptocercus wrighti* and four termite species, *Zootermopsis nevadensis*, *Hodotermopsis sjostedti*, *Cryptotermes secundus* and *Macrotermes natalensis*. Note that the *Macrotermes* sequence is derived from a pseudogene as it has an inframe stop codon and appears to lack the first part of the signal peptide. Also note the unusual seventh cysteine in the *Cryptotermes* sequence. Identical amino acid residues are highlighted in black, conservative substitutions are in grey and the cysteine residues are highlighted in red. An inframe stop codon in the *Macrotermes* sequence is highlighted in yellow.

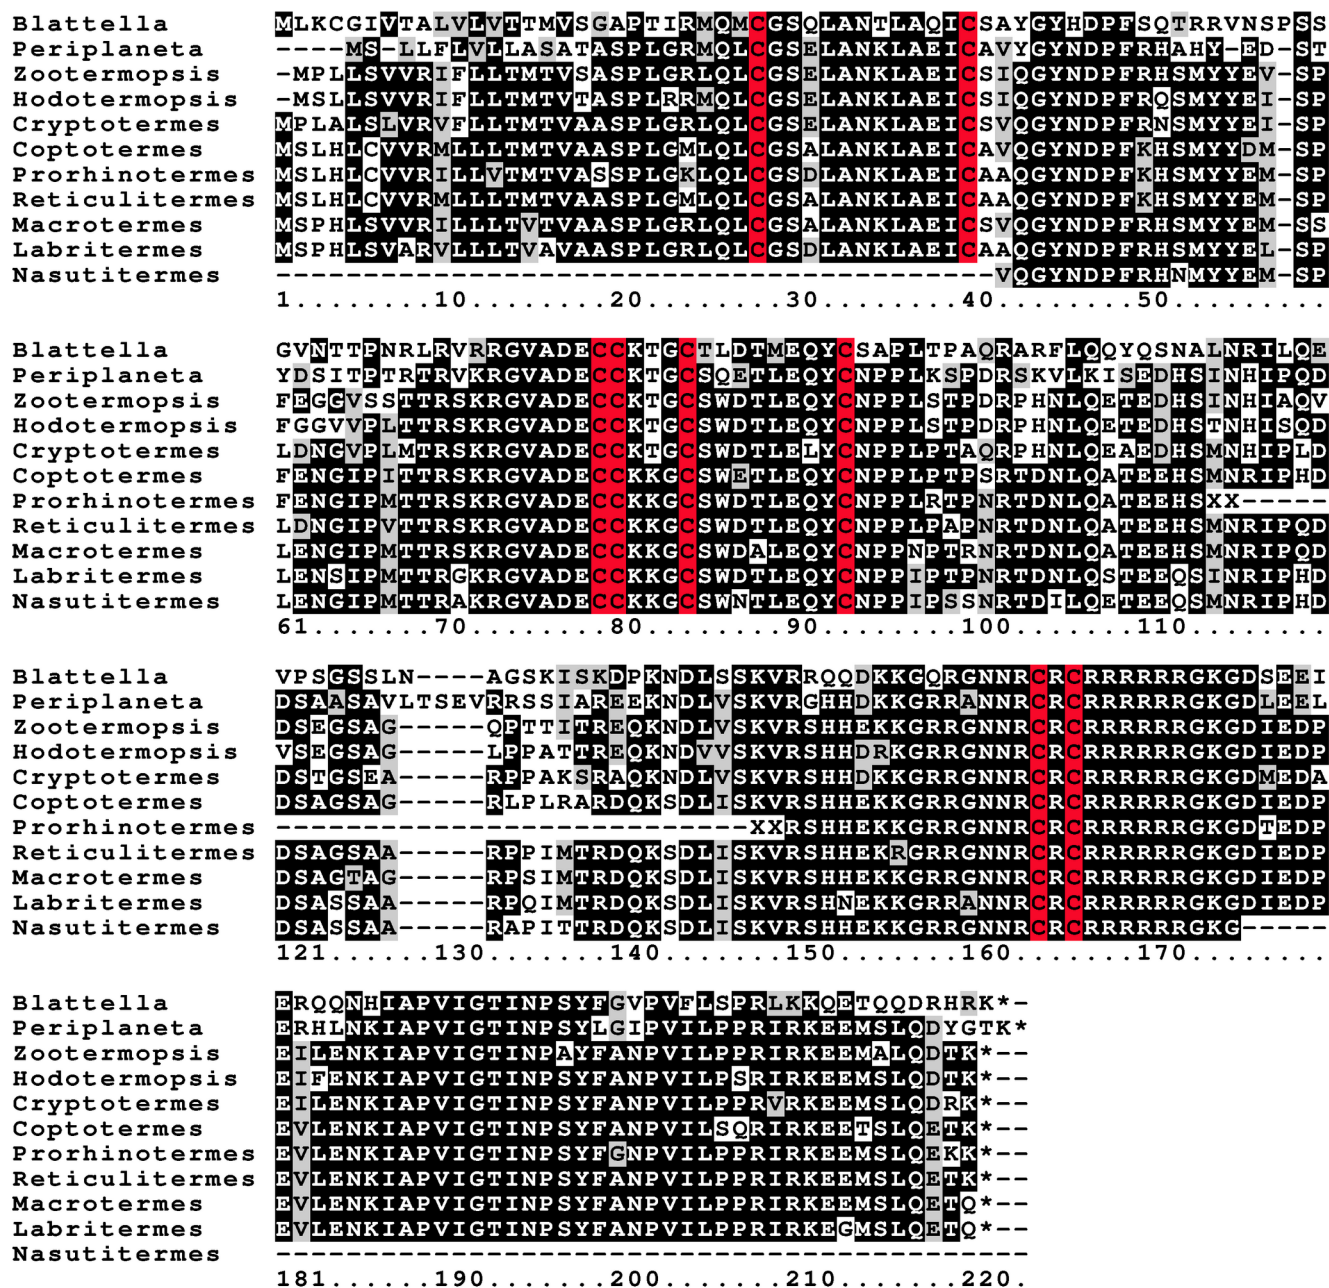

**Figure S2.** Sequence alignment of the predicted long IGFs from two cockroaches, *Blattella germanica* and *Periplaneta americana*, and nine termite species, *Zootermopsis nevadensis*, *Hodotermopsis sjostedti*, *Cryptotermes secundus*, *Coptotermes formosanus*, *Prorhinotermes simplex*, *Reticulitermes speratus*, *Macrotermes natalensis*, *Labritermes buttelreepeni* and *Nasutitermes takasagoensis*. Note that the *Prorhinotermes* and *Nasutitermes* sequences are incomplete due to lack of data. Highlighting of residues as in figure S1.



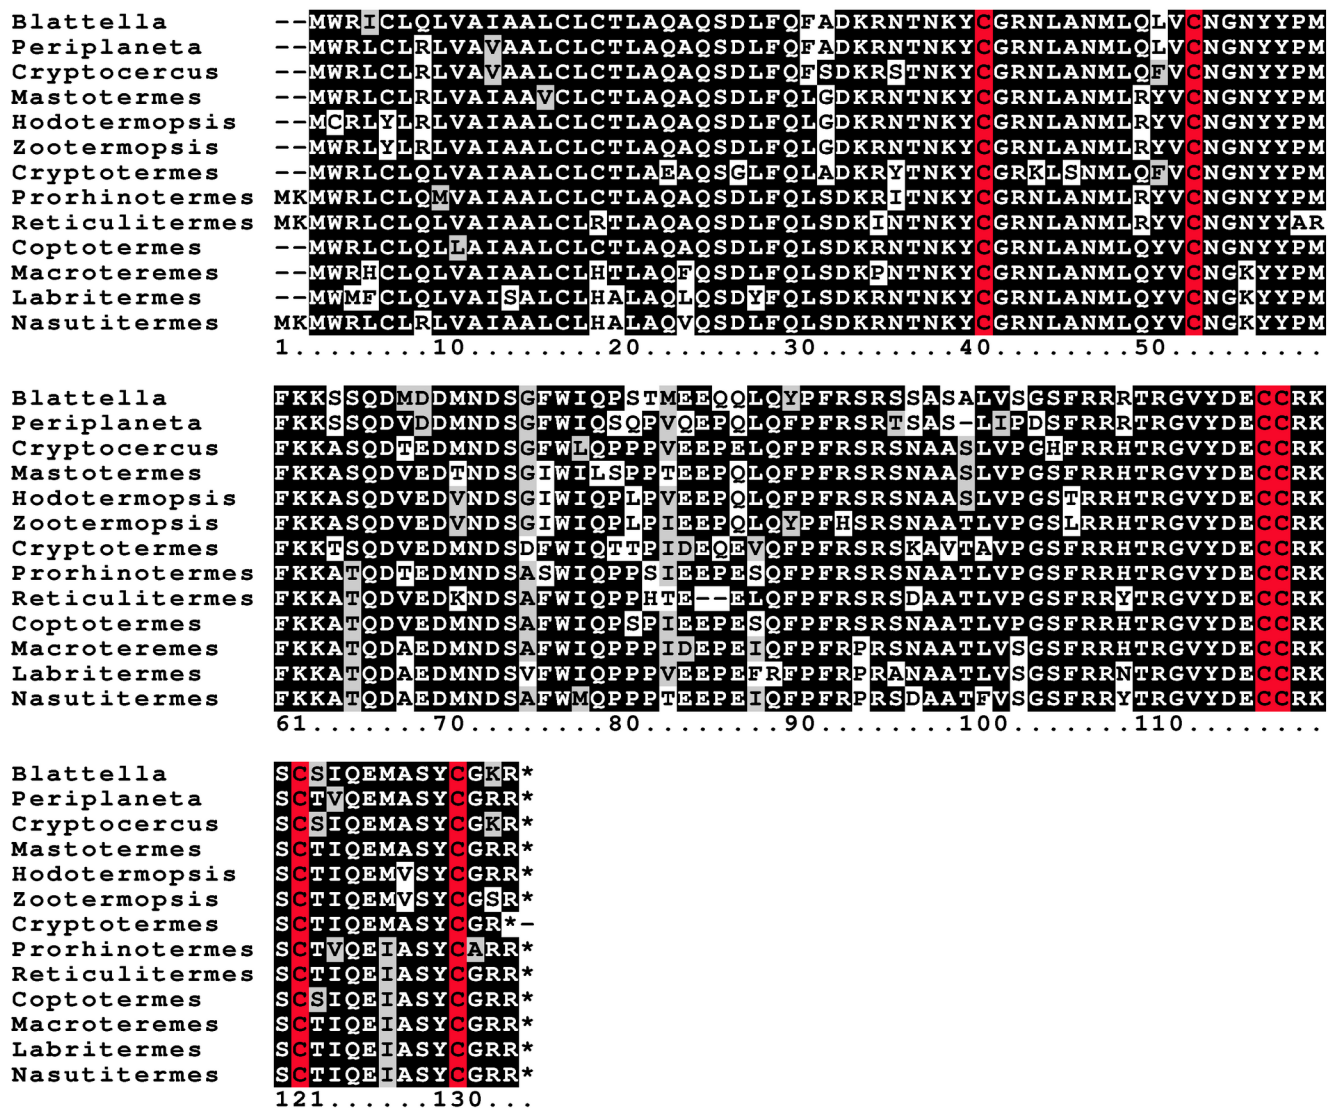

**Figure S4.** Sequence alignment of the predicted atirpins from three cockroach species, *Blattella germanica*, *Periplaneta americana* and *Cryptocercus wrighti* and ten termite species, *Mastotermes darwiniensis*, *Zootermopsis nevadensis*, *Hodotermopsis sjostedti*, *Cryptotermes secundus*, *Prorhinotermes simplex*, *Coptotermes formosanus*, *Reticulitermes speratus*, *Macrotermes natalensis*, *Labritermes buttelreepeni* and *Nasutitermes takasagoensis*. Highlighting of residues as in figure S1.



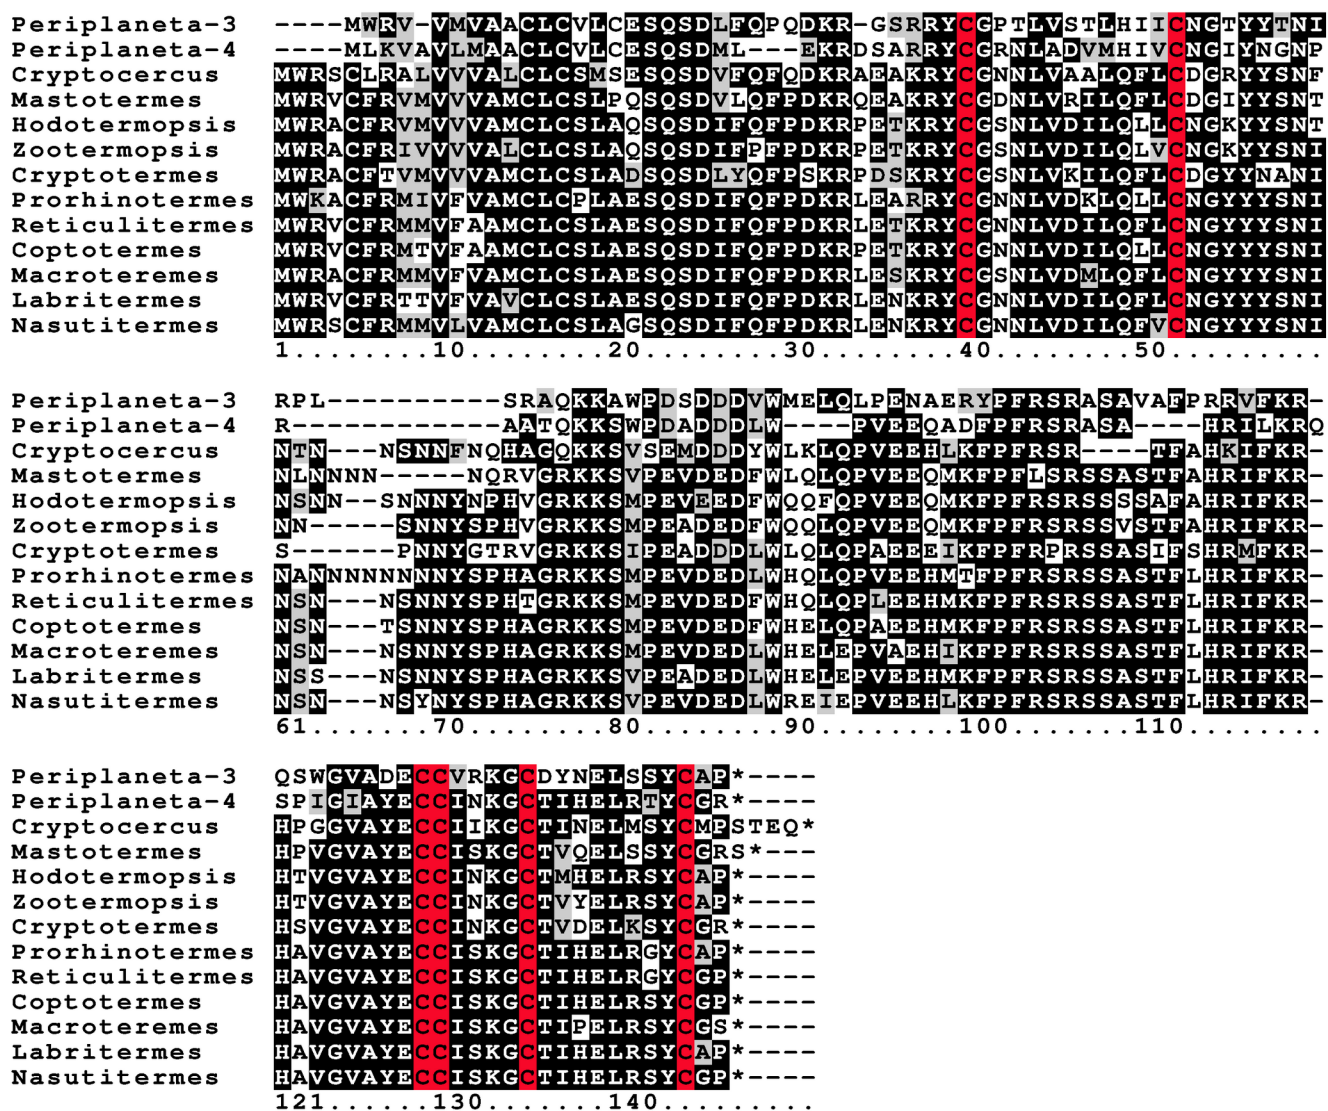

**Figure S5.** Sequence alignment of the predicted birpins from two cockroach species, *Periplaneta americana* and *Cryptocercus wrighti* and ten termite species, *Mastotermes darwiniensis*, *Zootermopsis nevadensis*, *Hodotermopsis sjostedti*, *Cryptotermes secundus*, *Prorhinotermes simplex*, *Coptotermes formosanus*, *Reticulitermes speratus*, *Macrotermes natalensis*, *Labritermes buttelreepeni* and *Nasutitermes takasagoensis*. Note that these sequences are not as well conserved as the atirpin sequences (Fig. S4). Highlighting of residues as in figure S1.

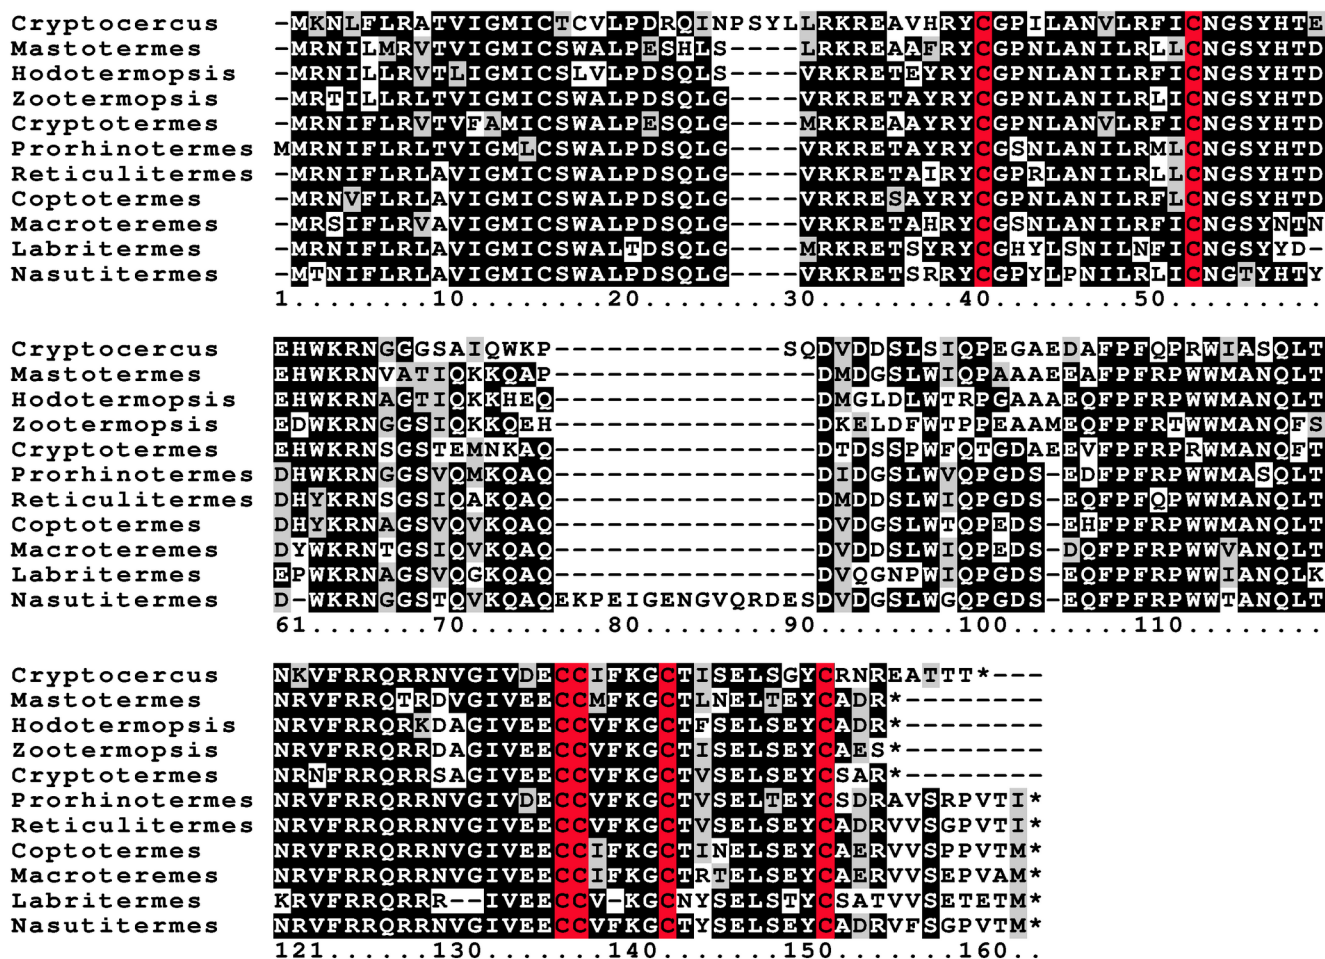

**Figure S6.** Sequence alignment of the predicted cirpins from one cockroach species, *Cryptocercus wrighti* and ten termite species, *Mastotermes darwiniensis*, *Zootermopsis nevadensis*, *Hodotermopsis sjostedti*, *Cryptotermes secundus*, *Prorhinotermes simplex*, *Coptotermes formosanus*, *Reticulitermes speratus*, *Macrotermes natalensis*, *Labritermes buttelreeperi* and *Nasutitermes takasagoensis*. Note that these sequences are not as well conserved as the atirpin sequences (Fig. S4). Highlighting of residues as in figure S1.

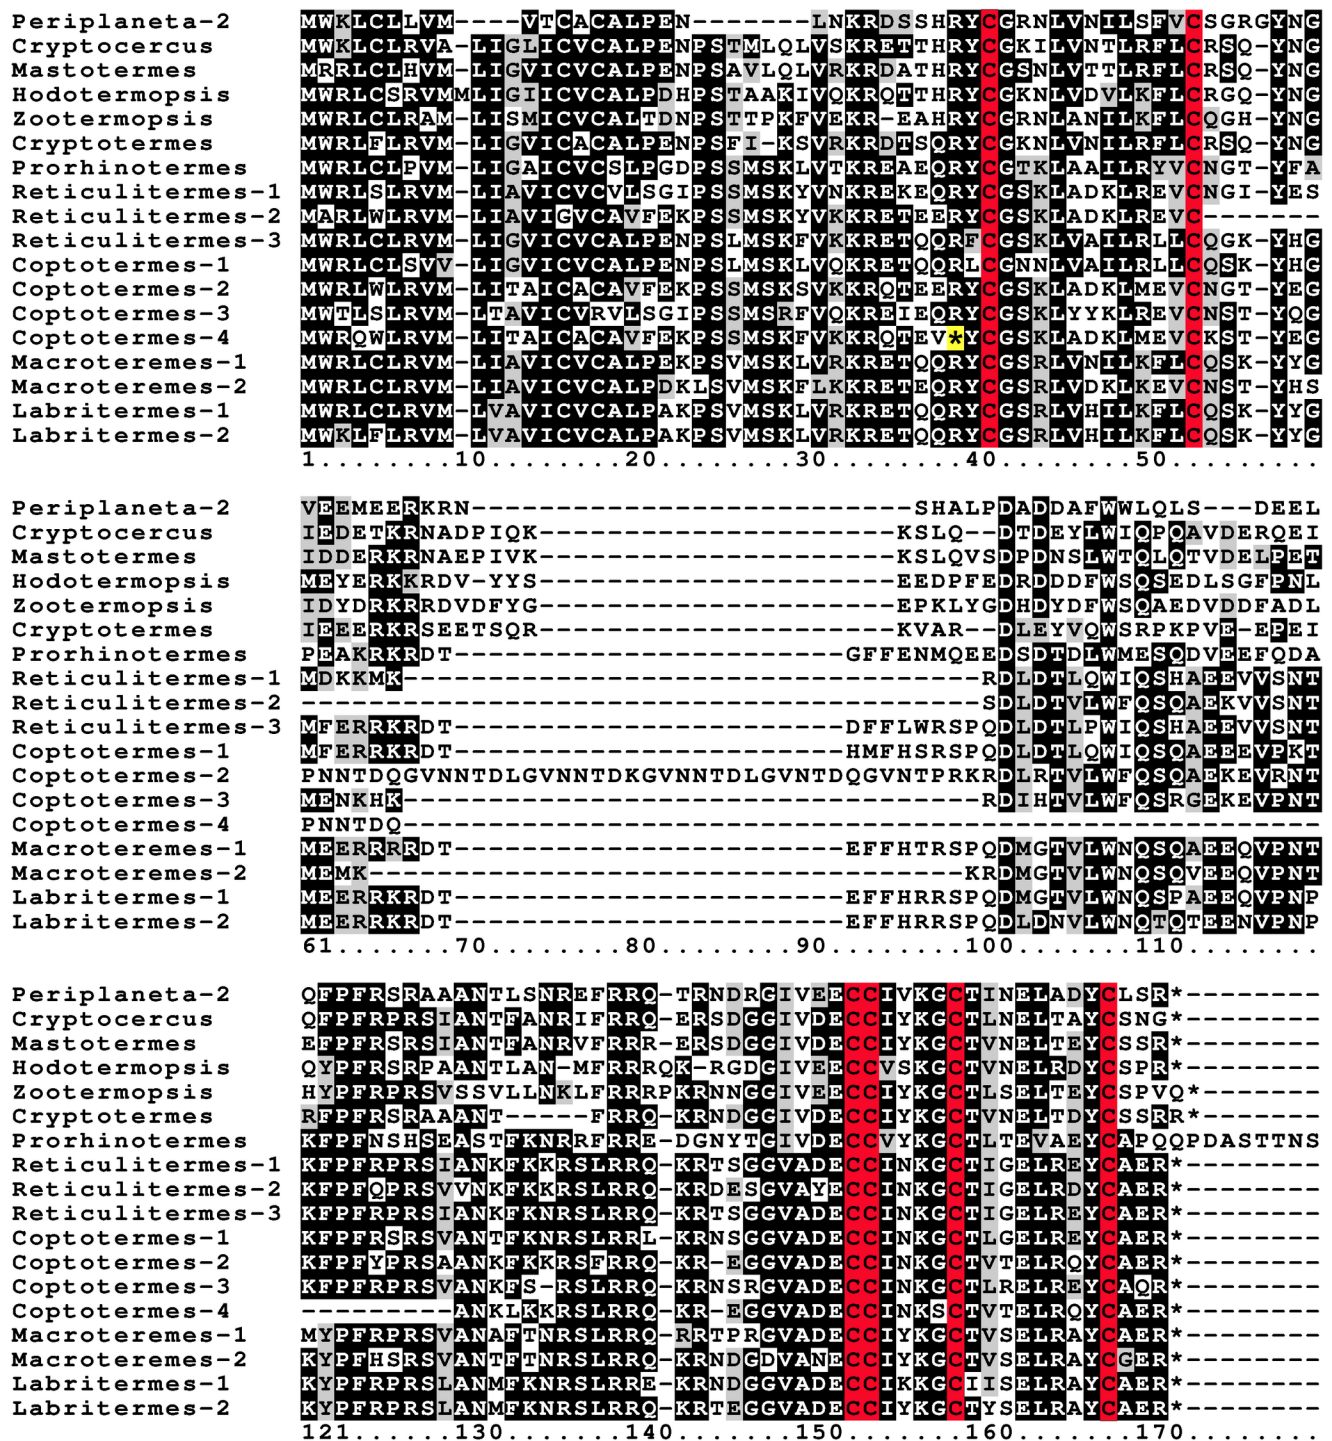

**Figure S7.** Sequence alignment of the predicted brovipirins from two cockroach species, *Periplaneta americana* and *Cryptocercus wrighti* and ten termite species, *Mastotermes darwiniensis*, *Zootermopsis nevadensis*, *Hodotermopsis sjostedti*, *Cryptotermes secundus*, *Prorhinotermes simplex*, *Coptotermes formosanus*, *Reticulitermes speratus*, *Macrotermes natalensis*, *Labritermes buttelreepeni* and *Nasutitermes takasagoensis*. Note that the coding sequence for brovipirin 4 from *Coptotermes* contains as stop codon (highlighted in yellow) and is thus unlikely to be functional and that some sequences are incomplete due to lack of data. Other highlighting of residues as in figure S1.

**Figure S8.** Sequence similarity tree of Blattodea sirps.

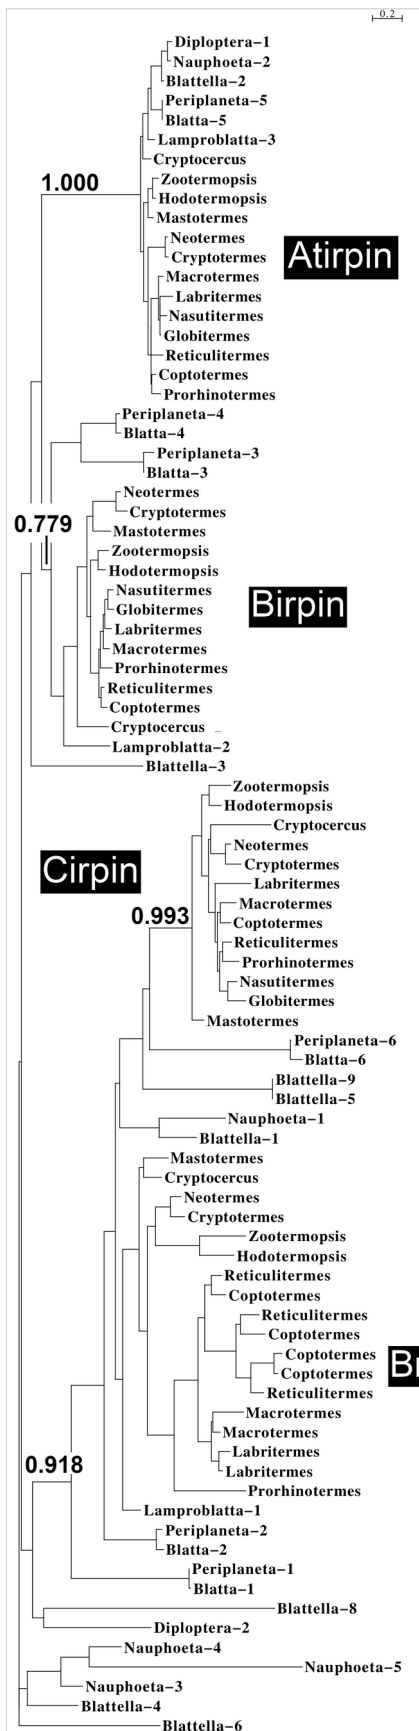

*M.nat-aa* ValAlaAspLeuLeuMetAlaIleTyrLeuLeuValThrGly  
*M.nat-nt* gtgataataatgctgtagttgcagacctattaatggcaatctatctactggtgactgga  
*C.sec-nt* ataataattggtttccgcagtttcagatttgtaatggcgttttatctactggtgattggg  
*C.sec-aa* ValSerAspLeuLeuMetAlaPheTyrLeuLeuValIleGly

*M.nat-aa* ThrGlnGlyCys\*\*\*PheArgGlyHisTyrHisArgAspAlaHisSerTrpIleSerSer  
*M.nat-nt* actcagggttggttaattccg-ggacattatcacagagaggcacacagctggatatcgtct  
*C.sec-nt* atccaggactgtcagttccgaggcaactatcacaaggaggctcacaagtggatgtcatct  
*C.sec-aa* IleGlnAspCysGlnPheArgGlyAsnTyrHisLysAspAlaHisLysTrpMetSerSer

*M.nat-aa* \*\*\*ValCysThrLeuIleGlyMetValAlaIleThrSerSerAsp  
*M.nat-nt* tgagtatgcacgctaattggcatggtcgcgatcacgtcatcagaagtgaatatcaatac  
*C.sec-nt* tggggatgcacgctcatcggtatggtcgcaatgacgtcatcagaagtgagtctcagcctc  
*C.sec-aa* TrpGlyCysThrLeuIleGlyMetValAlaMetThrSerSerAsp

**Figure S9.** The only remaining “coding” exon of LGR3 from *Macrotermes natalensis*. Nucleotide and conceptual translated amino acid sequences are compared with those from the orthologous exon from *Cryptotermes secundus*, in which LGR3 is presumed to be functional. Highlighted in black is the predicted amino acid sequence encoded by the *C. secundus* exon as well as those amino acid residues that are conserved in *M. natalensis*. Although some amino acid substitutions are conservative, there are also two in-frame stop codons as well as a single nucleotide deletion (all highlighted in yellow). Hence this can not be part of a functional protein. *M.nat-aa* and *M.nat-nt* *M.natalensis* amino acid and nucleotide sequences respectively, *C.sec-aa* and *C.sec-nt*, the same for *C. secundus*.

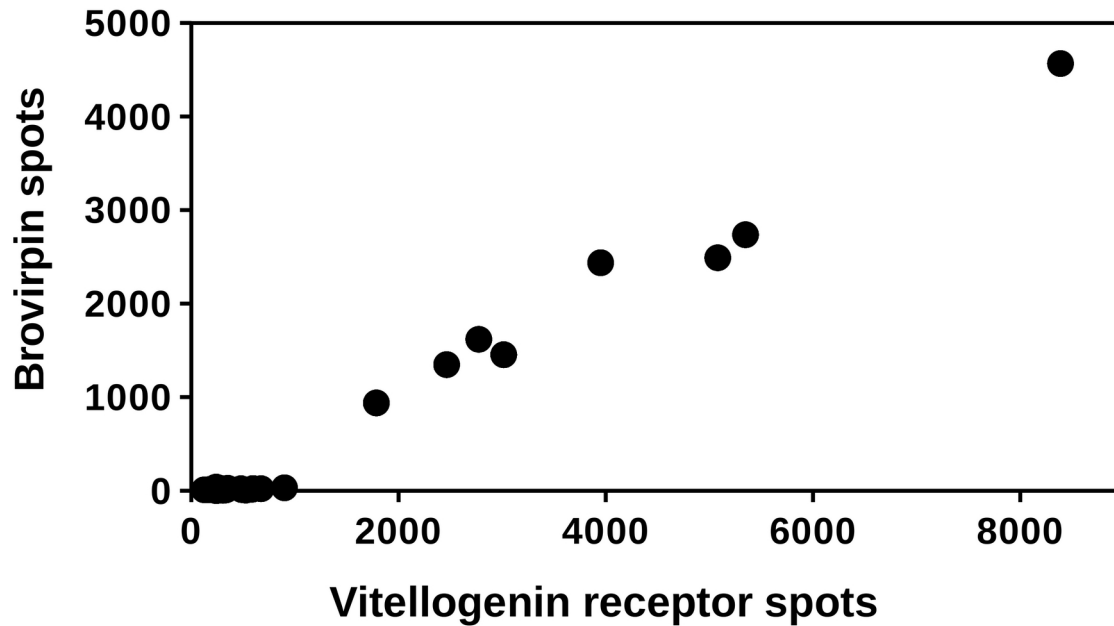

**Figure S10.** Correlation between the numbers of spots for vitellogenin receptor and brovirpin in transcriptome SRAs from *C. secundus* queens. Note that only those SRAs that have large numbers of brovirpin spots also have large numbers of vitellogenin receptor spots. The SRAs used here are ERR2615943, ERR2615944, ERR2615945, ERR2615946, SRR5457742, SRR5457743, SRR5457744, SRR5457745, SRR12381714, SRR12381716, SRR12381718, SRR12381721, SRR12381723, SRR12381725, SRR12381727, SRR12381728, SRR12381730, SRR12381732, SRR12381734, SRR12381736, SRR12381738, SRR12381740, SRR12381743, SRR12381744, SRR12381745, SRR12381746, SRR12381747, SRR12381748, SRR12381755 and SRR12381756.

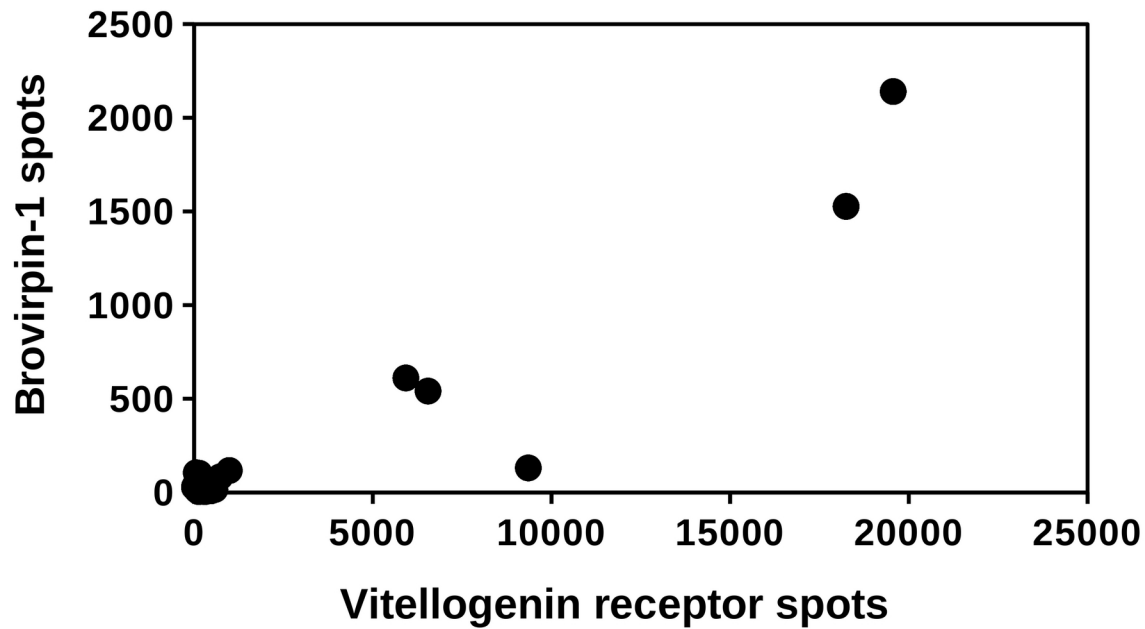

**Figure S11.** Correlation between the numbers of spots for vitellogenin receptor and brovirpin in transcriptome SRAs from *M. natalensis*. Note that only those SRAs that have large numbers of brovirpin spots also have large numbers of vitellogenin receptor spots. The SRAs used here are : SRR13396076, SRR13396077, SRR13396078, SRR13396079, SRR13396080, SRR13396081, SRR13396082, SRR13396083, SRR13396084, SRR13396085, SRR13396086, SRR13396087, SRR13396088, SRR13396089, SRR13396090, SRR13396091, SRR13396092, SRR13396093, SRR13396094, SRR13396095, SRR13396096, SRR13396097, SRR13396098, SRR13396099 and SRR13396100.

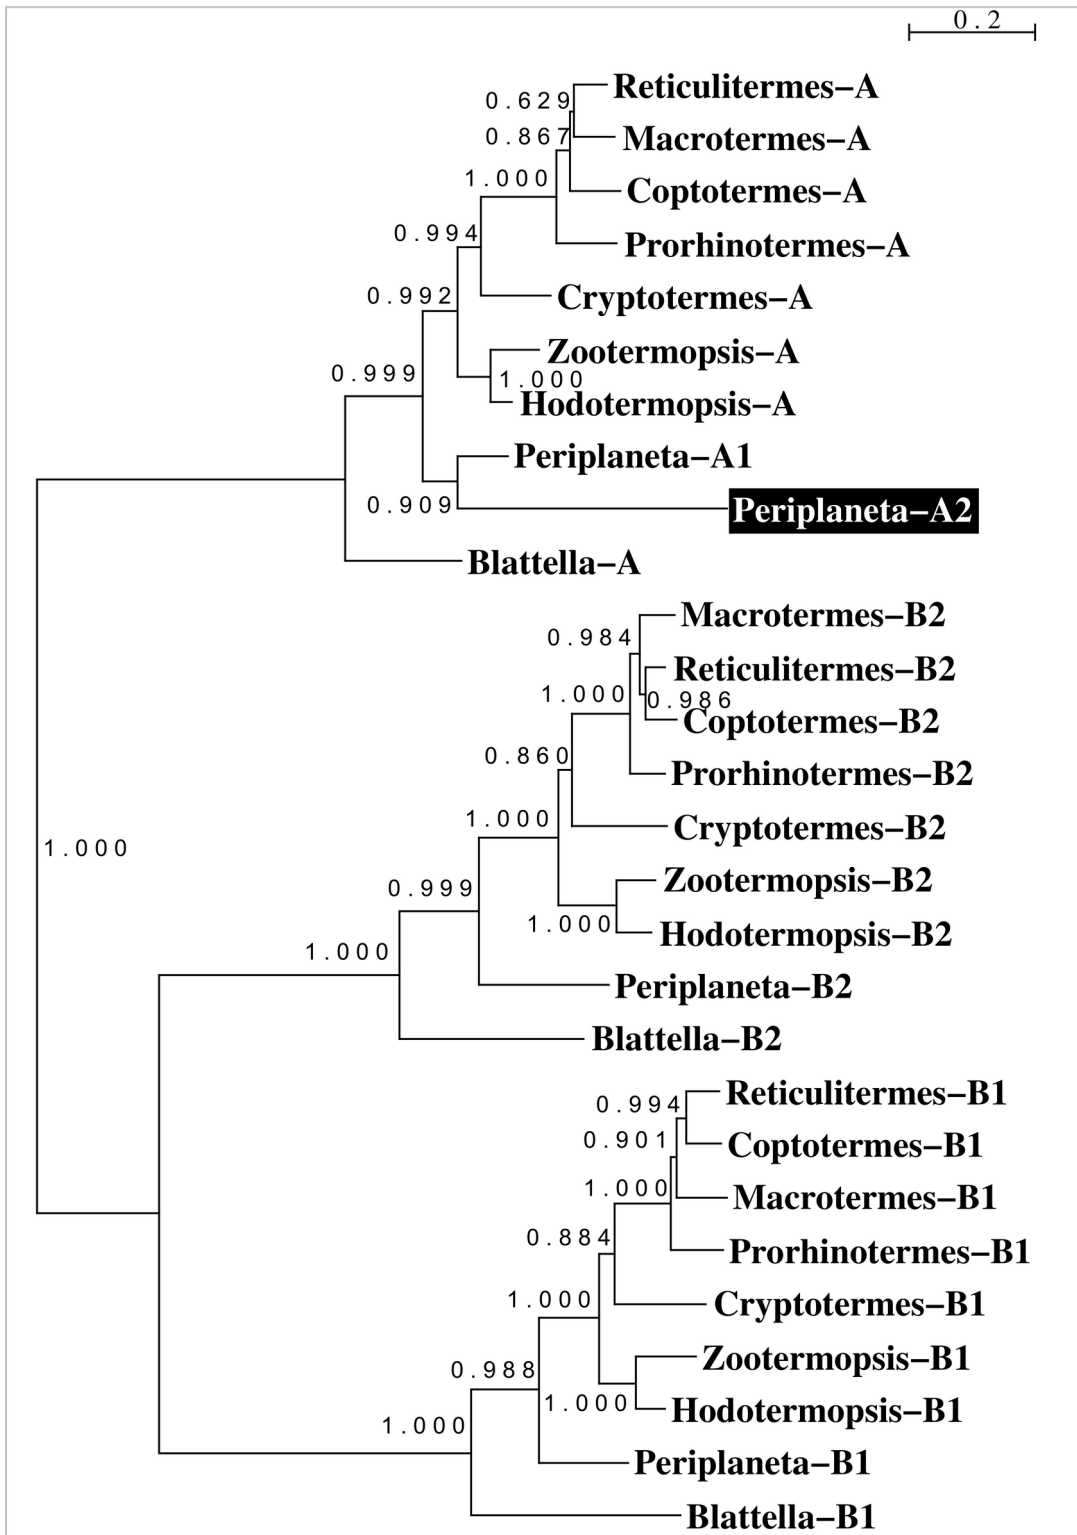

**Figure S12.** Phylogenetic tree of the termite insulin RTKs, showing that although *Periplaneta* has four such receptors, termites have only three.



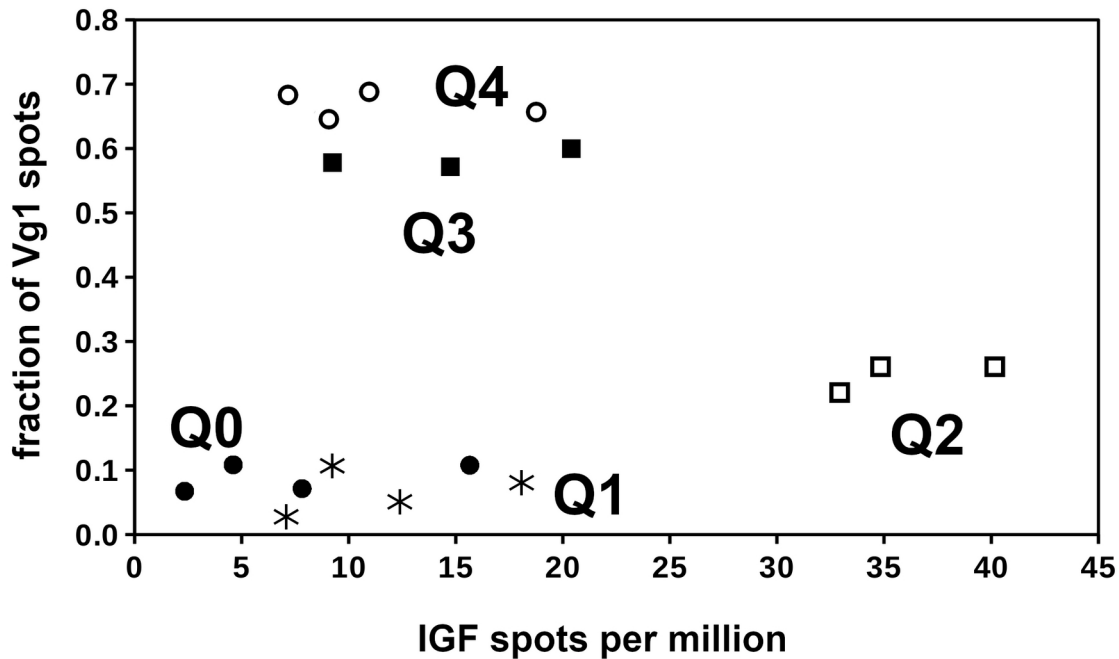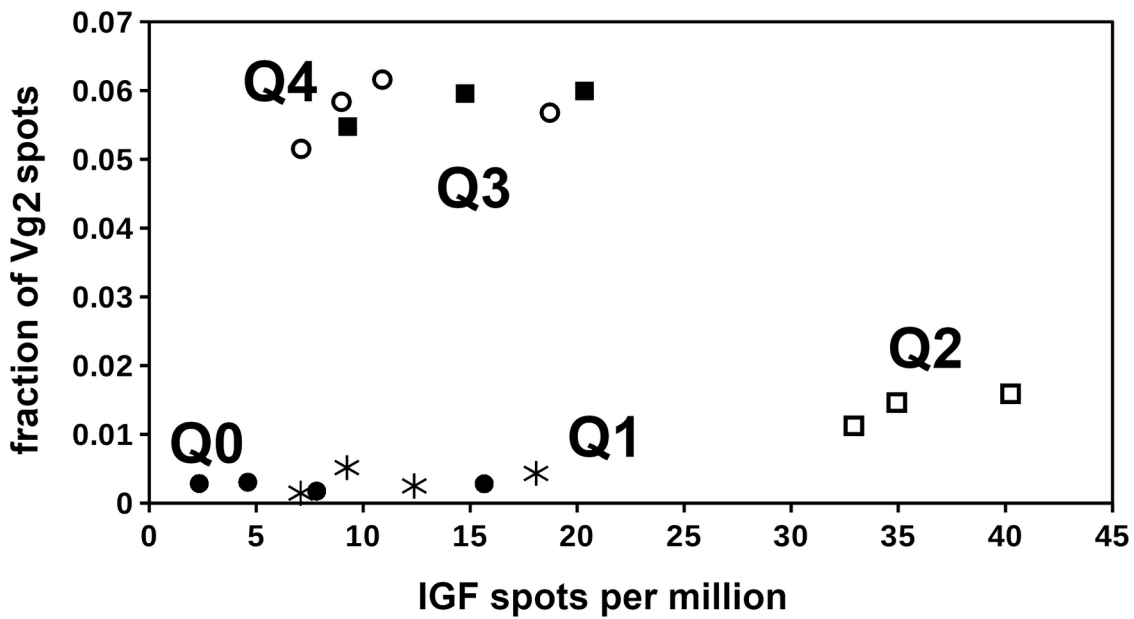

**Figure S13.** Top panel shows the correlation between the number of IGF and vitellogenin 1 spots in *M. natalensis* queens of different ages, Q0 (closed circles), Q1 (asterisks), Q2 (open squares), Q3 (closed squares) and Q4 (open circles). Note that in Q0 and Q1 queens the fraction of vitellogenin 1 spots is similar, that it increases significantly in Q2 queens and then becomes very high in Q3 and Q4 queens. The bottom panel show the correlation between IGF reads and vitellogenin 2, thus illustrating that qualitatively the results are identical for vitellogenins 1 and 2. Note that IGF expression appears highest in Q2 queens.

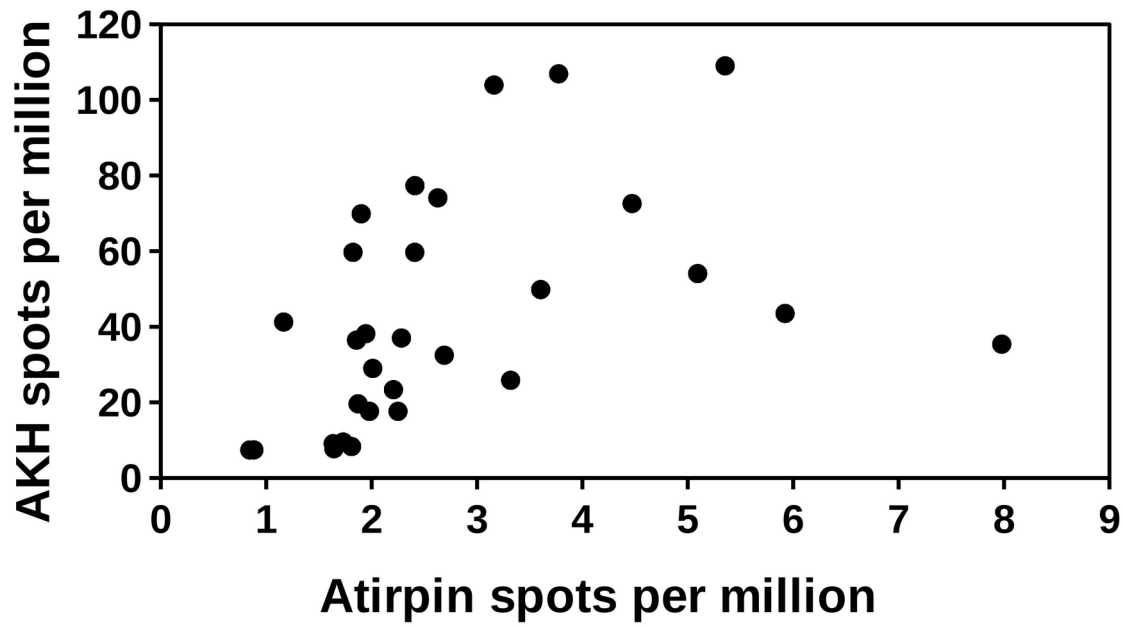

**Figure S14.** Data from *C. secundus* queens showing the correlation between spots for atirpin and AKH. Same data those in figs. 7-9 from the main text.
